# Supplementary material for: Fused Filament Fabrication of WC-10Co Hardmetals: A Study on Binder Formulations, and printing variables.
Source: Preprints.org preprint supplement (doi:10.20944/preprints202405.0642.v1), 2024-05-10
Supplement: Supplementary file 1 [file supplementary]

Fused Filament Fabrication of WC-10Co Hardmetals: A Study on Binder Formulations, and printing variables.

Supplementary Material

| M1  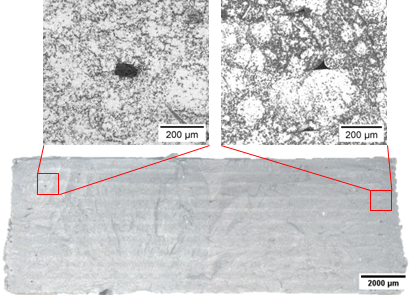 | M2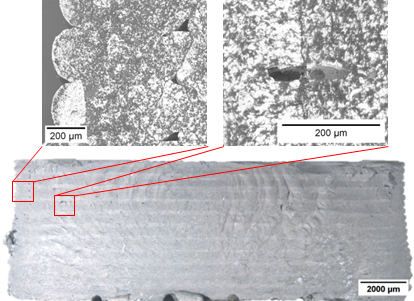 |
| --- | --- |
| M3  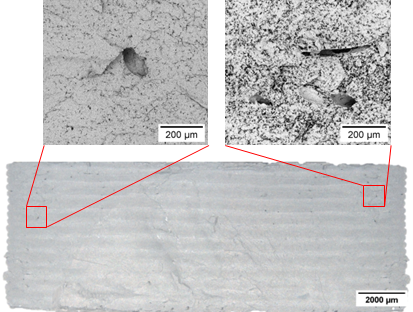 | M4  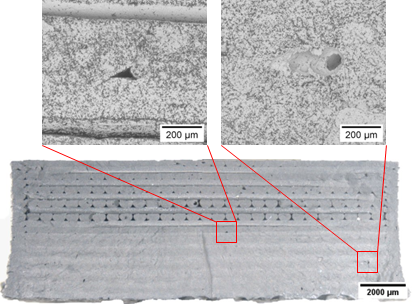 |

Fig 1. SEM-BSE details and Optical Microscopy of the Green Samples printed at 10 mm/s after cryogenic fracture for the different feedstocks printed at 210 °C a), M1-P b) M2-P c) M3-Pd) M4-P.
